# Supplementary material for: Highly sensitive AlGaN/GaN HEMT biosensors using an ethanolamine modification strategy for bioassay applications
Source: Royal Society of Chemistry journal article supplement (doi:10.1039/c9ra02055a), 2019-01-01
Supplement: c9ra02055a1.pdf [file c9ra02055a1.pdf]

## SUPPORTING INFORMATION

### Highly sensitive AlGaIn/GaN HEMT biosensor using ethanolamine modification strategy for bioassay applications

Zhiqi Gu,<sup>ab</sup> Jin Wang,<sup>bd</sup> Bin Miao,<sup>bc</sup> Lei Zhao,<sup>bce</sup> Xinsheng Liu,<sup>bce</sup> Dongmin Wu,<sup>\*ab</sup>  
Jiadong Li,<sup>\*abc</sup>

a. School of Nano Technology and Nano Bionics, University of Science and Technology of China, Hefei 230026, China

b. i-Lab, Suzhou Institute of Nano-Tech and Nano-Bionics, Chinese Academy of Sciences, Suzhou 215125, People's Republic of China

c. Key Laboratory of multifunctional nanomaterials and smart systems, Chinese Academy of Sciences, Suzhou 215125, People's Republic of China

d. The College of Materials Sciences and Engineering, Shanghai University, Shanghai 200444, China.

e. The College of Nuclear Technology and Automation Engineering, Chengdu University of Technology, Chengdu 610059, China.

E-mail: [jdli2009@sinano.ac.cn](mailto:jdli2009@sinano.ac.cn)

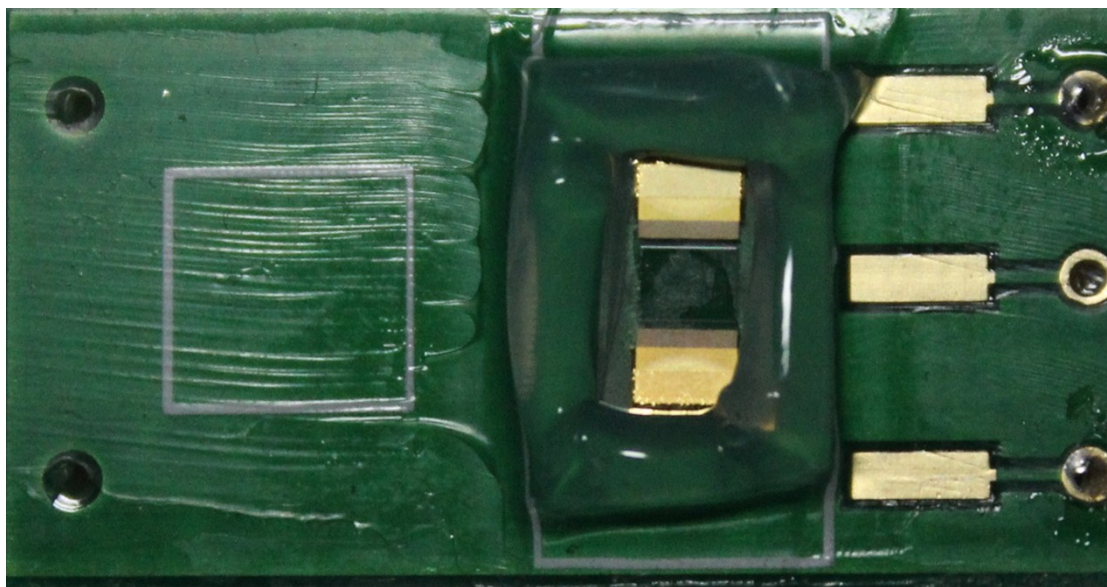

**Fig. S1** The Photograph of the AlGaIn/GaN HEMT biosensor chip.

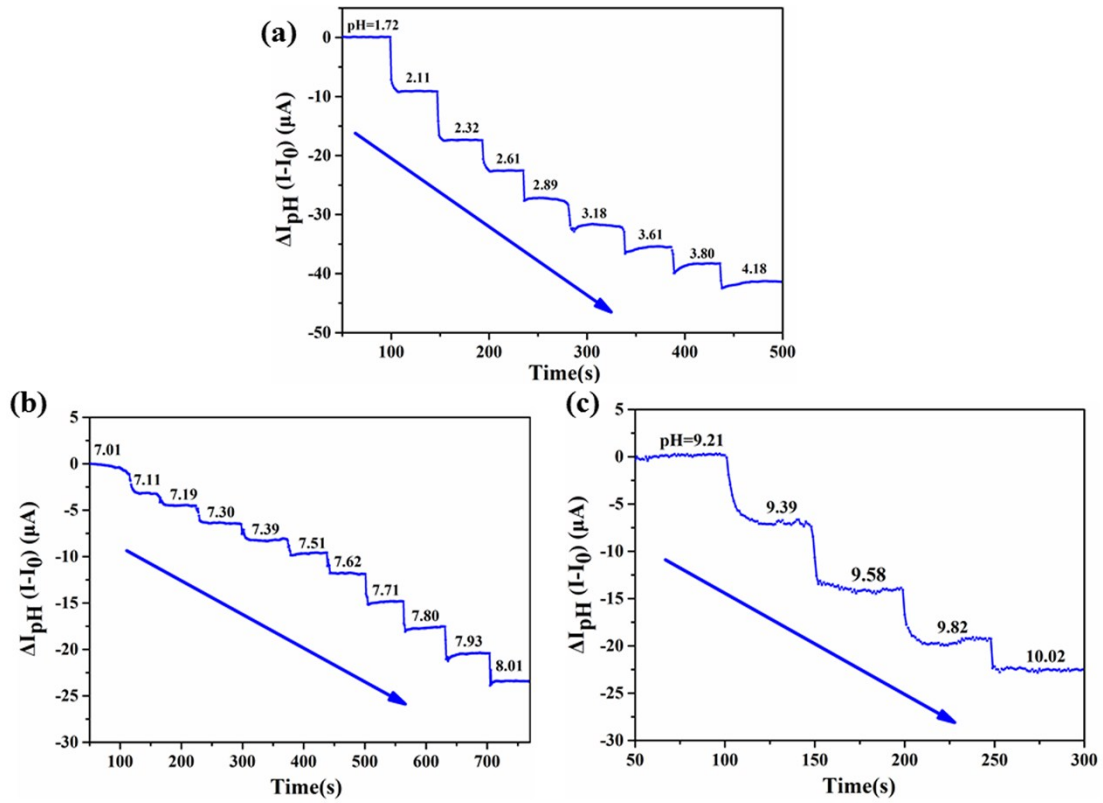

**Fig. S2** Detection results of traditional AlGaIn/GaN based pH sensor in the range of pH = 1.72-4.18, pH = 7.01-8.01 and pH = 9.21-10.02.

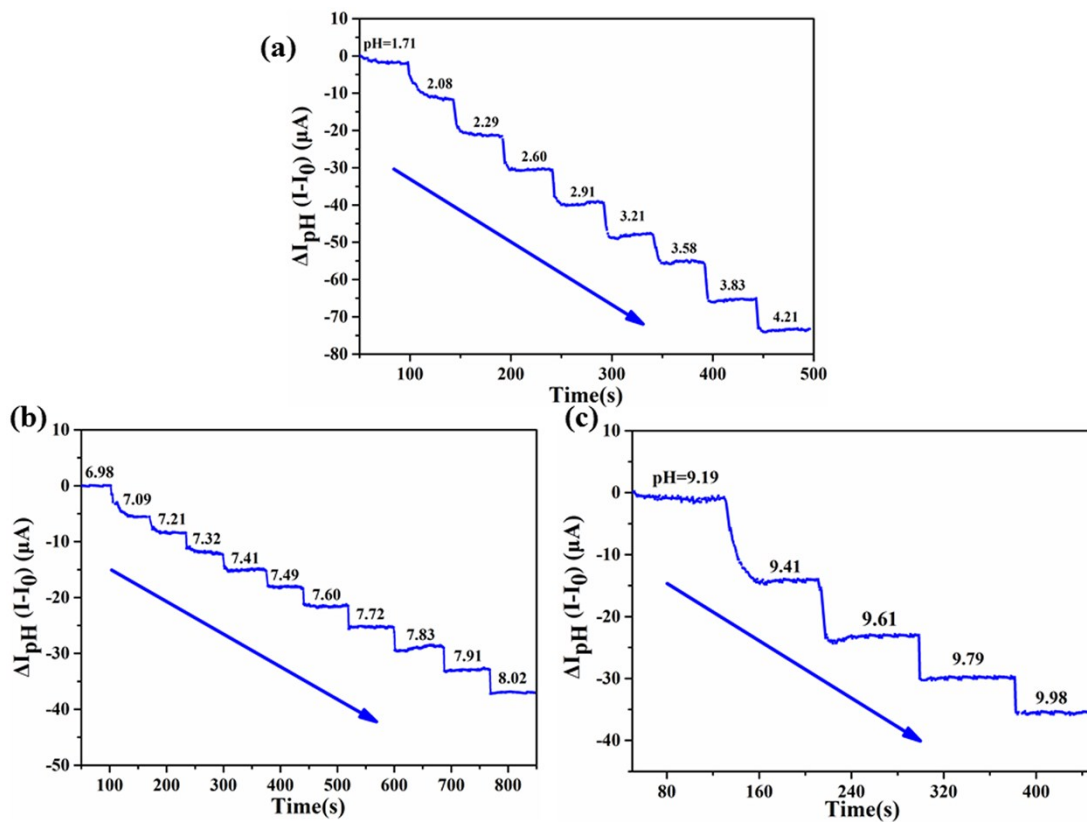

**Fig. S3** Detection results of APTES modified AlGa<sub>N</sub>/Ga<sub>N</sub> based pH sensor in the range of pH = 1.71-4.21, pH = 6.98-8.02 and pH = 9.19-9.98.
